# Supplementary material
Source: Springer Nature journal article supplement (https://www.springermedizin.de/resource/supplementary/12889_2007_1160_MOESM1_ESM.pdf/9502584)
Supplement: MOESM1 [file 9502584]

a)

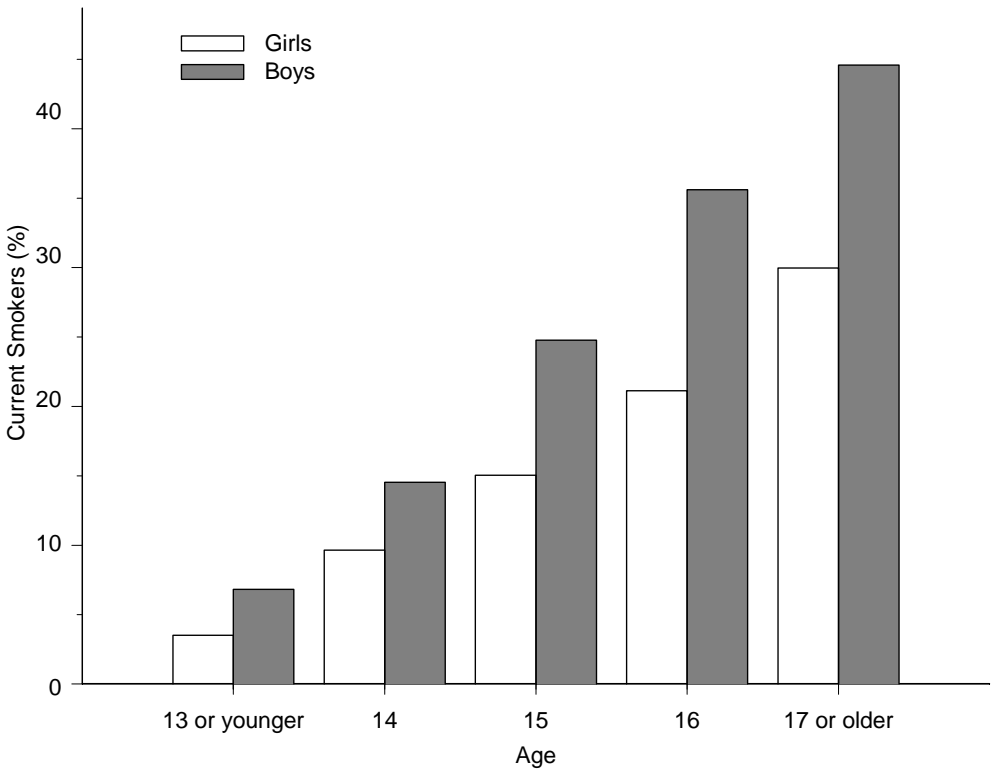

\*Current smoking is defined as having smoked on 1 or more days of the past 30 days

b)

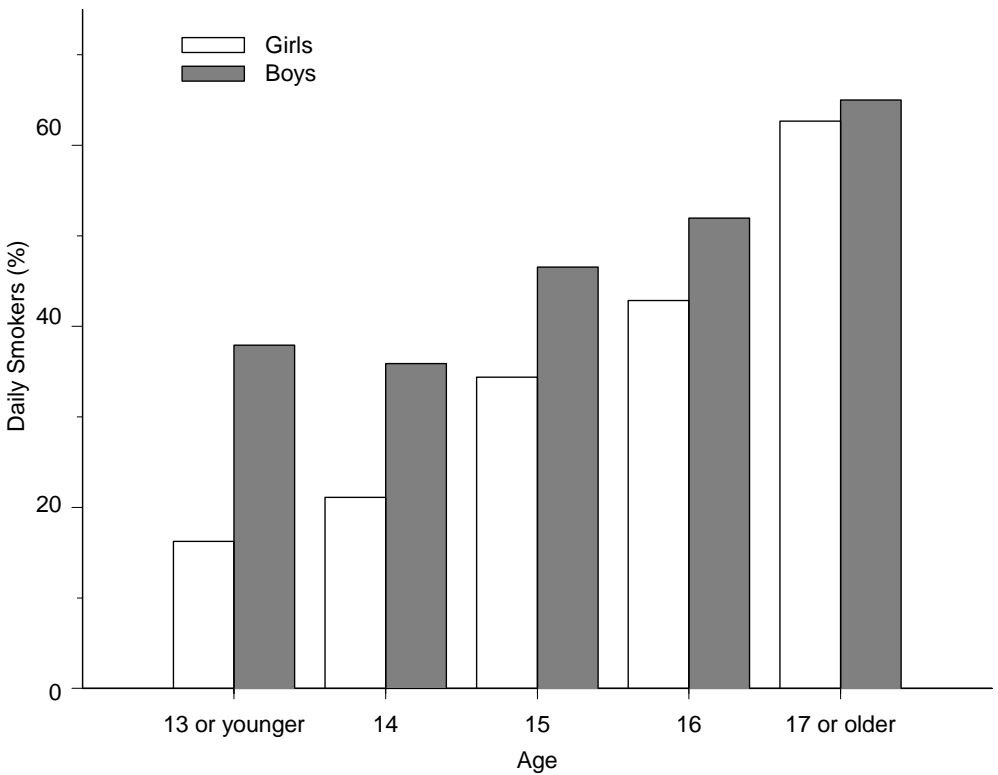

\*Current smoking is defined as having smoked on 1 or more days of the past 30 days
